# Supplementary material
Source: PubMed Central journal article supplement (PMC8381816)
Supplement: KHVI_A_1908058_SM3820.pdf [file KHVI_A_1908058_SM3820.pdf]

| S.No. | Countries   | Covid-19 incidences | Covid-19 deaths | Covid-19 deaths/ million | Mortality rate |
|-------|-------------|---------------------|-----------------|--------------------------|----------------|
| 1     | US          | 1497244             | 89420           | 275.8                    | 5.97           |
| 2     | UK          | 240161              | 34466           | 523.33                   | 14.35          |
| 3     | Italy       | 224760              | 31763           | 529.64                   | 14.13          |
| 4     | Spain       | 231350              | 27650           | 593.04                   | 11.95          |
| 5     | France      | 142291              | 27625           | 421.07                   | 19.41          |
| 6     | Brazil      | 233511              | 15662           | 80.46                    | 6.70           |
| 7     | Belgium     | 55280               | 9052            | 794.95                   | 16.37          |
| 8     | Germany     | 176244              | 8027            | 96.96                    | 4.55           |
| 9     | Iran        | 118392              | 6937            | 86.27                    | 5.85           |
| 10    | Canada      | 77002               | 5782            | 160.83                   | 7.50           |
| 11    | Netherlands | 43995               | 5680            | 334.11                   | 12.91          |
| 12    | Mexico      | 47144               | 5045            | 42.25                    | 10.70          |
| 13    | China       | 82947               | 4634            | 3.33                     | 5.58           |
| 14    | Turkey      | 148067              | 4096            | 50.67                    | 2.76           |
| 15    | Sweden      | 29677               | 3674            | 353.15                   | 12.37          |
| 16    | India       | 90927               | 2872            | 2.34                     | 3.15           |
| 17    | Peru        | 92273               | 2648            | 87.19                    | 2.86           |
| 18    | Russia      | 281752              | 2631            | 18.84                    | 0.93           |
| 19    | Switzerland | 30587               | 1808            | 213.2                    | 5.91           |
| 20    | Portugal    | 29036               | 1218            | 118.4                    | 4.19           |
| 21    | Romania     | 16871               | 1107            | 56.71                    | 6.56           |

**Supplementary Table 1:** Countries were arranged based on highest to lowest deaths due to COVID-19 infections. Data for COVID-19 incidences and death has been shown as of 17<sup>th</sup> May 2020.

| S.No. | Countries    | Covid-19 incidences | Covid-19 deaths | Covid-19 deaths/ million | Mortality rate | Flu incidences | Flu deaths/10000 | Flu Vac coverage | T.B.    | T.B. deaths/100000 | BCG coverage |
|-------|--------------|---------------------|-----------------|--------------------------|----------------|----------------|------------------|------------------|---------|--------------------|--------------|
| 1     | USA          | 7494671             | 212660          | 642                      | 2.83           | 10%            | 15               | 69.10%           | 10000   | 0.12               | N.A.         |
| 2     | Brazil       | 4849229             | 144767          | 680                      | 2.98           | 20%            | 42.96            | 71.80%           | 84000   | 2.74               | 86.90%       |
| 3     | India        | 6397896             | 99833           | 72                       | 1.56           | 30%            | 64.03            | N.A.             | 2840000 | 43.1               | 99%          |
| 4     | Mexico       | 748315              | 78078           | 604                      | 10.43          | 20%            | 19.52            | 82.30%           | 27000   | 2.32               | 95%          |
| 5     | UK           | 460178              | 42202           | 621                      | 9.17           | 20%            | 23.01            | 70.50%           | 6600    | 0.31               | 75%          |
| 6     | Italy        | 317409              | 35918           | 594                      | 11.31          | 20%            | 8.15             | 50.00%           | 3500    | 0.38               | N.A.         |
| 7     | Peru         | 818297              | 32535           | 983                      | 3.97           | 20%            | 9                | 89%              | 37000   | 7.07               | 80%          |
| 8     | France       | 577505              | 32019           | 490                      | 5.54           | 20%            | 14.1             | 50.00%           | 5300    | 0.43               | N.A.         |
| 9     | Spain        | 778607              | 31973           | 684                      | 4.10           | 20%            | 10.21            | 51.40%           | 5500    | 0.34               | N.A.         |
| 10    | Iran         | 461044              | 26380           | 313                      | 5.72           | 30%            | 19.67            | N.A.             | 13000   | 2.13               | 99.50%       |
| 11    | Colombia     | 835339              | 26196           | 513                      | 3.13           | 20%            | 23.72            | 20%              | 15000   | 3.24               | 90%          |
| 12    | Russia       | 1194643             | 21077           | 144                      | 1.76           | 10%            | 27.61            | N.A.             | 115000  | 10.77              | 99%          |
| 13    | Argentina    | 765002              | 20288           | 448                      | 2.65           | 10%            | 48.73            | N.A.             | 11000   | 1.32               | 95%          |
| 14    | South Africa | 676084              | 16866           | 283                      | 2.49           | 10%            | 86.33            | N.A.             | 454000  | 59.33              | 90.50%       |
| 15    | Chile        | 464750              | 12822           | 669                      | 2.75           | 10%            | 16.25            | 75%              | 3000    | 2.11               | 97.80%       |
| 16    | Ecuador      | 138584              | 11433           | 646                      | 8.24           | 20%            | 33.85            | N.A.             | 8400    | 4.19               | N.A.         |
| 17    | Indonesia    | 295599              | 10972           | 40                       | 3.71           | 30%            | 25.03            | N.A.             | 1020000 | 56.74              | 92.20%       |
| 18    | Belgium      | 121059              | 10023           | 864                      | 8.27           | 20%            | 24.22            | 60%              | 1100    | 0.33               | N.A.         |
| 19    | Germany      | 295530              | 9586            | 114                      | 3.24           | 20%            | 10.86            | 34.80%           | 6500    | 0.21               | N.A.         |
| 20    | Canada       | 160535              | 9319            | 246                      | 5.80           | 10%            | 9.34             | 60%              | 1800    | 0.18               | N.A.         |
| 21    | Iraq         | 367474              | 9231            | 228                      | 2.51           | 30%            | 18.82            | N.A.             | 16000   | 6.56               | 99%          |
| 22    | Turkey       | 320070              | 8262            | 98                       | 2.58           | 30%            | 14.43            | 5.90%            | 14000   | 0.97               | 94%          |
| 23    | Bolivia      | 135716              | 8001            | 683                      | 5.89           | 20%            | 61.01            | 30%              | 13000   | 9.91               | 99%          |
| 24    | Pakistan     | 313431              | 6499            | 29                       | 2.07           | 30%            | 39.45            | N.A.             | 510000  | 34.21              | 95%          |
| 25    | Netherlands  | 124097              | 6419            | 374                      | 5.17           | 20%            | 10.66            | 80%              | 980     | 0.11               | N.A.         |
| 26    | Egypt        | 103317              | 5946            | 58                       | 5.75           | 20%            | 29.13            | N.A.             | 13000   | 0.33               | 99%          |
| 27    | Sweden       | 93615               | 5893            | 583                      | 6.29           | 20%            | 15.57            | 55%              | 900     | 0.12               | 26.40%       |
| 28    | Philippines  | 316678              | 5616            | 51                       | 1.77           | 30%            | 126.54           | N.A.             | 324000  | 39.06              | 99%          |
| 29    | Bangladesh   | 366383              | 5305            | 32                       | 1.44           | 30%            | 21.99            | N.A.             | 362000  | 61.12              | 99%          |
| 30    | Romania      | 129658              | 4862            | 253                      | 3.74           | 10%            | 22.24            | 15%              | 16000   | 3.68               | 90%          |
| 31    | Saudi Arabia | 335097              | 4794            | 137                      | 1.43           | 30%            | 43.74            | N.A.             | 3800    | 5.21               | 98%          |
| 32    | China        | 85424               | 4634            | 3                        | 5.42           | 20%            | 15               | 7%               | 918000  | 2.11               | 99%          |
| 33    | Ukraine      | 217661              | 4261            | 98                       | 1.95           | 10%            | 9.25             | N.A.             | 41000   | 7.26               | 45%          |
| 34    | Guatemala    | 92409               | 3261            | 181                      | 3.52           | 20%            | 58.32            | N.A.             | 4200    | 2.8                | 99%          |
| 35    | Poland       | 95773               | 2570            | 68                       | 2.68           | 10%            | 17.56            | 13.40%           | 7200    | 0.92               | 93.70%       |
| 36    | Panama       | 113342              | 2387            | 551                      | 2.10           | 20%            | 21.08            | 65%              | 2000    | 6.42               | 99%          |
| 37    | Honduras     | 77598               | 2380            | 239                      | 3.06           | 20%            | 10.72            | 70%              | 3500    | 5.89               | 99%          |
| 38    | Morocco      | 126044              | 2229            | 60                       | 1.76           | 20%            | 26.02            | N.A.             | 37000   | 11.6               | 99%          |
| 39    | Dominican R. | 112728              | 2108            | 194                      | 1.86           | 20%            | 22.77            | N.A.             | 6300    | 5.76               | 99%          |
| 40    | Switzerland  | 53832               | 2074            | 239                      | 3.85           | 20%            | 7.4              | 45%              | 610     | 0.1                | N.A.         |
| 41    | Portugal     | 76396               | 1977            | 194                      | 2.58           | 20%            | 23.07            | 52%              | 2400    | 1                  | 99%          |
| 42    | Ireland      | 36597               | 1806            | 365                      | 4.93           | 20%            | 13.04            | 60%              | 340     | 0.3                | 94%          |
| 43    | Algeria      | 51690               | 1741            | 40                       | 3.36           | 20%            | 23.53            | N.A.             | 30000   | 9.41               | 99%          |
| 44    | Kazakhstan   | 108044              | 1725            | 92                       | 1.59           | 30%            | 17.3             | N.A.             | 16000   | 2.41               | 99%          |
| 45    | Israel       | 256071              | 1629            | 177                      | 0.63           | 30%            | 17.38            | 59.80%           | 320     | 0.13               | 90%          |
| 46    | Japan        | 83563               | 1571            | 12                       | 1.88           | 20%            | 24.28            | 51%              | 21000   | 0.6                | 98.10%       |
| 47    | Afghanistan  | 39290               | 1458            | 37                       | 3.71           | 30%            | 50.61            | N.A.             | 61000   | 77.66              | 46%          |
| 48    | Moldova      | 54064               | 1336            | 331                      | 2.47           | 20%            | 23.29            | N.A.             | 6200    | 5.55               | 99%          |
| 49    | Ethiopia     | 76098               | 1205            | 10                       | 1.58           | 20%            | 86.94            | N.A.             | 191000  | 43.14              | 69%          |
| 50    | Nigeria      | 59001               | 1112            | 5                        | 1.88           | 20%            | 246.59           | N.A.             | 586000  | 128.71             | 85%          |
| 51    | Kyrgyzstan   | 47056               | 1065            | 163                      | 2.26           | 30%            | 14.5             | N.A.             | 8500    | 8.4                | 99%          |

**Supplementary Table 2:** Countries were arranged based on highest to lowest deaths due to COVID-19 infections and compared with respect to BCG vaccination coverage, T.B. incidences, T.B. deaths/100,000, Flu vaccination coverage, Flu incidences and Flu deaths/100,000. Data for COVID-19 incidences and death has been shown as of 1<sup>st</sup> October 2020.

| S.No. | Countries              | Covid-19 incidences | Covid-19 deaths | Covid-19 deaths/million | Mortality rate | Flu incidences | Flu deaths/100000 | Flu Vac coverage | T.B.    | T.B. deaths/100000 | BCG coverage |
|-------|------------------------|---------------------|-----------------|-------------------------|----------------|----------------|-------------------|------------------|---------|--------------------|--------------|
| 1     | USA                    | 20445654            | 354215          | 1067                    | 1.73           | 10%            | 15                | 69.10%           | 10000   | 0.12               | N.A.         |
| 2     | Brazil                 | 7675973             | 194976          | 914                     | 2.54           | 20%            | 42.96             | 71.80%           | 84000   | 2.74               | 86.90%       |
| 3     | India                  | 10286709            | 149018          | 107                     | 1.44           | 30%            | 64.03             | N.A.             | 2840000 | 43.1               | 99%          |
| 4     | Mexico                 | 1426094             | 125807          | 971                     | 8.82           | 20%            | 19.52             | 82.30%           | 27000   | 2.32               | 95%          |
| 5     | Italy                  | 2107166             | 74159           | 1227                    | 3.51           | 20%            | 8.15              | 50.00%           | 3500    | 0.38               | N.A.         |
| 6     | UK                     | 2448780             | 73512           | 1080                    | 3.00           | 20%            | 23.01             | 70.50%           | 6600    | 0.31               | 75%          |
| 7     | France                 | 2620425             | 64632           | 989                     | 2.46           | 20%            | 14.1              | 50.00%           | 5300    | 0.43               | N.A.         |
| 8     | Russia                 | 3159297             | 57019           | 391                     | 1.80           | 10%            | 27.61             | N.A.             | 115000  | 10.77              | 99%          |
| 9     | Iran                   | 1225142             | 55223           | 653                     | 4.50           | 30%            | 19.67             | N.A.             | 13000   | 2.13               | 99.50%       |
| 10    | Spain                  | 1936718             | 50837           | 1087                    | 2.62           | 20%            | 10.21             | 51.40%           | 5500    | 0.34               | N.A.         |
| 11    | Argentina              | 1625514             | 43245           | 952                     | 2.66           | 10%            | 48.73             | N.A.             | 11000   | 1.32               | 95%          |
| 12    | Colombia               | 1642775             | 43213           | 845                     | 2.63           | 20%            | 23.72             | 20%              | 15000   | 3.24               | 90%          |
| 13    | Peru                   | 1015137             | 37680           | 1135                    | 3.71           | 20%            | 9                 | 89%              | 37000   | 7.07               | 80%          |
| 14    | Germany                | 1745518             | 34182           | 407                     | 1.95           | 20%            | 10.86             | 34.80%           | 6500    | 0.21               | N.A.         |
| 15    | Poland                 | 1294878             | 28554           | 755                     | 2.20           | 10%            | 17.56             | 13.40%           | 7200    | 0.92               | 93.70%       |
| 16    | South Africa           | 1057161             | 28469           | 477                     | 2.69           | 10%            | 86.33             | N.A.             | 454000  | 59.33              | 90.50%       |
| 17    | Indonesia              | 743198              | 22138           | 81                      | 2.97           | 30%            | 25.03             | N.A.             | 1020000 | 56.74              | 92.20%       |
| 18    | Turkey                 | 2208652             | 20881           | 246                     | 0.94           | 30%            | 14.43             | 5.90%            | 14000   | 0.97               | 94%          |
| 19    | Belgium                | 646496              | 19528           | 1681                    | 3.02           | 20%            | 24.22             | 60%              | 1100    | 0.33               | N.A.         |
| 20    | Ukraine                | 1064479             | 18680           | 428                     | 1.75           | 10%            | 9.25              | N.A.             | 41000   | 7.26               | 45%          |
| 21    | Chile                  | 608973              | 16608           | 865                     | 2.72           | 10%            | 16.25             | 75%              | 3000    | 2.11               | 97.80%       |
| 22    | Romania                | 632263              | 15767           | 822                     | 2.49           | 10%            | 22.24             | 15%              | 16000   | 3.68               | 90%          |
| 23    | Canada                 | 581395              | 15606           | 412                     | 2.68           | 10%            | 9.34              | 60%              | 1800    | 0.18               | N.A.         |
| 24    | Ecuador                | 212512              | 14034           | 789                     | 6.60           | 20%            | 33.85             | N.A.             | 8400    | 4.19               | N.A.         |
| 25    | Iraq                   | 595291              | 12813           | 315                     | 2.15           | 30%            | 18.82             | N.A.             | 16000   | 6.56               | 99%          |
| 26    | Czechia                | 732022              | 11711           | 1093                    | 1.59           | 20%            | 15.38             | 20%              | 550     | 0.31               | 80%          |
| 27    | Netherlands            | 796981              | 11432           | 666                     | 1.43           | 20%            | 10.66             | 80%              | 980     | 0.11               | N.A.         |
| 28    | Pakistan               | 482178              | 10176           | 46                      | 2.11           | 30%            | 39.45             | N.A.             | 510000  | 34.21              | 95%          |
| 29    | Hungary                | 322514              | 9537            | 988                     | 2.95           | 10%            | 6.22              | 30%              | 920     | 0.42               | 99%          |
| 30    | Philippines            | 474064              | 9244            | 84                      | 1.94           | 30%            | 126.54            | N.A.             | 324000  | 39.06              | 99%          |
| 31    | Bolivia                | 160124              | 9165            | 780                     | 5.72           | 20%            | 61.01             | 30%              | 13000   | 9.91               | 99%          |
| 32    | Sweden                 | 437379              | 8727            | 861                     | 1.99           | 20%            | 15.57             | 55%              | 900     | 0.12               | 26.40%       |
| 33    | Switzerland            | 452296              | 7645            | 880                     | 1.69           | 20%            | 7.4               | 45%              | 610     | 0.1                | N.A.         |
| 34    | Egypt                  | 138062              | 7631            | 74                      | 5.52           | 20%            | 29.13             | N.A.             | 13000   | 0.33               | 99%          |
| 35    | Bulgaria               | 202266              | 7576            | 1099                    | 3.74           | 10%            | 12.22             | N.A.             | 1700    | 1.11               | 96%          |
| 36    | Bangladesh             | 513510              | 7559            | 46                      | 1.47           | 30%            | 21.99             | N.A.             | 362000  | 61.12              | 99%          |
| 37    | Morocco                | 439193              | 7388            | 199                     | 1.68           | 20%            | 26.02             | N.A.             | 37000   | 11.6               | 99%          |
| 38    | Portugal               | 413678              | 6906            | 678                     | 1.66           | 20%            | 23.07             | 52%              | 2400    | 1                  | 99%          |
| 39    | Saudi Arabia           | 362741              | 6223            | 177                     | 1.71           | 30%            | 43.74             | N.A.             | 3800    | 5.21               | 98%          |
| 40    | Austria                | 360815              | 6222            | 689                     | 1.72           | 20%            | 4.56              | 20%              | 650     | 0.36               | 99%          |
| 41    | Greece                 | 138850              | 4838            | 465                     | 3.48           | 20%            | 16.53             | 55%              | 490     | 0.3                | 31%          |
| 42    | Guatemala              | 138012              | 4813            | 266                     | 3.48           | 20%            | 58.32             | N.A.             | 4200    | 2.8                | 99%          |
| 43    | Tunisia                | 139140              | 4676            | 394                     | 3.36           | 20%            | 25.07             | N.A.             | 4200    | 3.26               | 92%          |
| 44    | China                  | 89071               | 4634            | 3                       | 5.20           | 20%            | 15                | 7%               | 918000  | 2.11               | 99%          |
| 45    | Bosnia and Herzegovina | 110985              | 4050            | 1238                    | 3.64           | 20%            | 5.7               | N.A.             | 1400    | 2.09               | 95%          |
| 46    | Panama                 | 246790              | 4022            | 925                     | 1.62           | 20%            | 21.08             | 65%              | 2000    | 6.42               | 99%          |
| 47    | Croatia                | 210837              | 3920            | 958                     | 1.85           | 20%            | 5.92              | 30%              | 560     | 0.67               | 98%          |
| 48    | Jordan                 | 294494              | 3834            | 374                     | 1.30           | 30%            | 21.86             | N.A.             | 530     | 0.3                | 86%          |
| 49    | Japan                  | 230304              | 3414            | 27                      | 1.48           | 20%            | 24.28             | 51%              | 21000   | 0.6                | 98.10%       |
| 50    | Israel                 | 423262              | 3325            | 362                     | 0.78           | 30%            | 17.38             | 59.80%           | 320     | 0.13               | 90%          |
| 51    | Serbia                 | 337923              | 3211            | 368                     | 0.95           | 20%            | 8.37              | 10%              | 1900    | 0.56               | 98%          |
| 52    | Honduras               | 122763              | 3141            | 315                     | 2.55           | 20%            | 10.72             | 70%              | 3500    | 5.89               | 99%          |
| 53    | Moldova                | 144818              | 2985            | 741                     | 2.06           | 20%            | 23.29             | N.A.             | 6200    | 5.55               | 99%          |
| 54    | Armenia                | 159738              | 2828            | 953                     | 1.77           | 30%            | 8.77              | N.A.             | 41      | 1.77               | 99%          |
| 55    | Algeria                | 99610               | 2756            | 62                      | 2.76           | 20%            | 23.53             | N.A.             | 30000   | 9.41               | 99%          |
| 56    | Slovenia               | 122152              | 2697            | 1297                    | 2.20           | 20%            | 12.73             | 12%              | 7       | 0.37               | 96%          |
| 57    | Myanmar                | 124630              | 2682            | 49                      | 2.15           | 30%            | 46.97             | N.A.             | 197000  | 58.72              | 91%          |
| 58    | Azerbaijan             | 218700              | 2641            | 259                     | 1.20           | 30%            | 15.29             | N.A.             | 6800    | 6.16               | 96%          |
| 59    | Georgia                | 227420              | 2505            | 629                     | 1.10           | 30%            | 9.43              | N.A.             | 4000    | 3.92               | 96%          |
| 60    | North Macedonia        | 83329               | 2503            | 1201                    | 3.00           | 20%            | 5.35              | 8%               | 270     | 0.83               | 93%          |
| 61    | Dominican Republic     | 170785              | 2414            | 221                     | 1.41           | 20%            | 22.77             | N.A.             | 6300    | 5.76               | 99%          |
| 62    | Kazakhstan             | 15547               | 2262            | 120                     | 14.54          | 30%            | 17.3              | N.A.             | 16000   | 2.41               | 99%          |
| 63    | Paraguay               | 107932              | 2262            | 315                     | 2.09           | 10%            | 25.28             | 85%              | 2700    | 4.84               | 87%          |
| 64    | Ireland                | 91779               | 2237            | 451                     | 2.43           | 20%            | 13.04             | 60%              | 340     | 0.3                | 94%          |
| 65    | Afghanistan            | 52513               | 2201            | 56                      | 4.19           | 30%            | 50.61             | N.A.             | 61000   | 77.66              | 46%          |
| 66    | Costa Rica             | 169321              | 2185            | 427                     | 1.29           | 20%            | 13.19             | N.A.             | 530     | 1.1                | 88%          |
| 67    | Slovakia               | 179543              | 2138            | 392                     | 1.19           | 10%            | 20.59             | 12%              | 350     | 0.41               | 90%          |
| 68    | Ethiopia               | 124264              | 1923            | 17                      | 1.54           | 20%            | 86.94             | N.A.             | 191000  | 43.14              | 69%          |
| 69    | Nepal                  | 260593              | 1856            | 63                      | 0.71           | 30%            | 47.47             | N.A.             | 44000   | 31.85              | 96%          |
| 70    | Kenya                  | 96458               | 1670            | 31                      | 1.73           | 20%            | 60.24             | N.A.             | 107000  | 95.98              | 95%          |
| 71    | Oman                   | 128867              | 1499            | 290                     | 1.16           | 30%            | 24.25             | N.A.             | 380     | 1.28               | 99%          |
| 72    | Libya                  | 100277              | 1478            | 214                     | 1.47           | 20%            | 26.9              | N.A.             | 2500    | 15.4               | 74%          |
| 73    | Lebanon                | 181503              | 1468            | 216                     | 0.80           | 30%            | 10.13             | N.A.             | 750     | 1                  | N.A.         |
| 74    | Sudan                  | 23316               | 1468            | 33                      | 6.29           | 10%            | 52.66             | N.A.             | 35000   | 25.83              | 92%          |
| 75    | Lithuania              | 140579              | 1458            | 539                     | 1.03           | 20%            | 11.95             | 15%              | 1600    | 4.39               | 97%          |
| 76    | Belarus                | 194284              | 1424            | 151                     | 0.73           | 10%            | 6.41              | N.A.             | 5200    | 1.79               | 97%          |
| 77    | Palestine              | 138004              | 1400            | 271                     | 1.01           | N.A.           | N.A.              | N.A.             | N.A.    | N.A.               | N.A.         |
| 78    | Kyrgyzstan             | 81034               | 1355            | 206                     | 1.67           | 30%            | 14.5              | N.A.             | 8500    | 8.4                | 99%          |
| 79    | El Salvador            | 45960               | 1336            | 224                     | 2.90           | 20%            | 33.17             | N.A.             | 2700    | 1.25               | 78%          |
| 80    | Denmark                | 163479              | 1298            | 224                     | 0.79           | 20%            | 13.58             | 42%              | 340     | 0.15               | 80%          |
| 81    | Nigeria                | 87607               | 1289            | 6                       | 1.47           | 20%            | 246.59            | N.A.             | 586000  | 128.71             | 85%          |
| 82    | Albania                | 58316               | 1181            | 411                     | 2.02           | 20%            | 11.23             | N.A.             | 550     | 0.2                | 99%          |
| 83    | Venezuela              | 113558              | 1028            | 36                      | 0.90           | 20%            | 24.45             | N.A.             | 8900    | 3.02               | 91%          |

**Supplementary Table 3:** Countries were arranged based on highest to lowest deaths due to COVID-19 infections and compared with respect to BCG vaccination coverage, T.B. incidences, T.B. deaths/100,000, Flu vaccination coverage, Flu incidences and Flu deaths/100,000. Data for COVID-19 incidences and death has been shown as of 31<sup>st</sup> December 2020

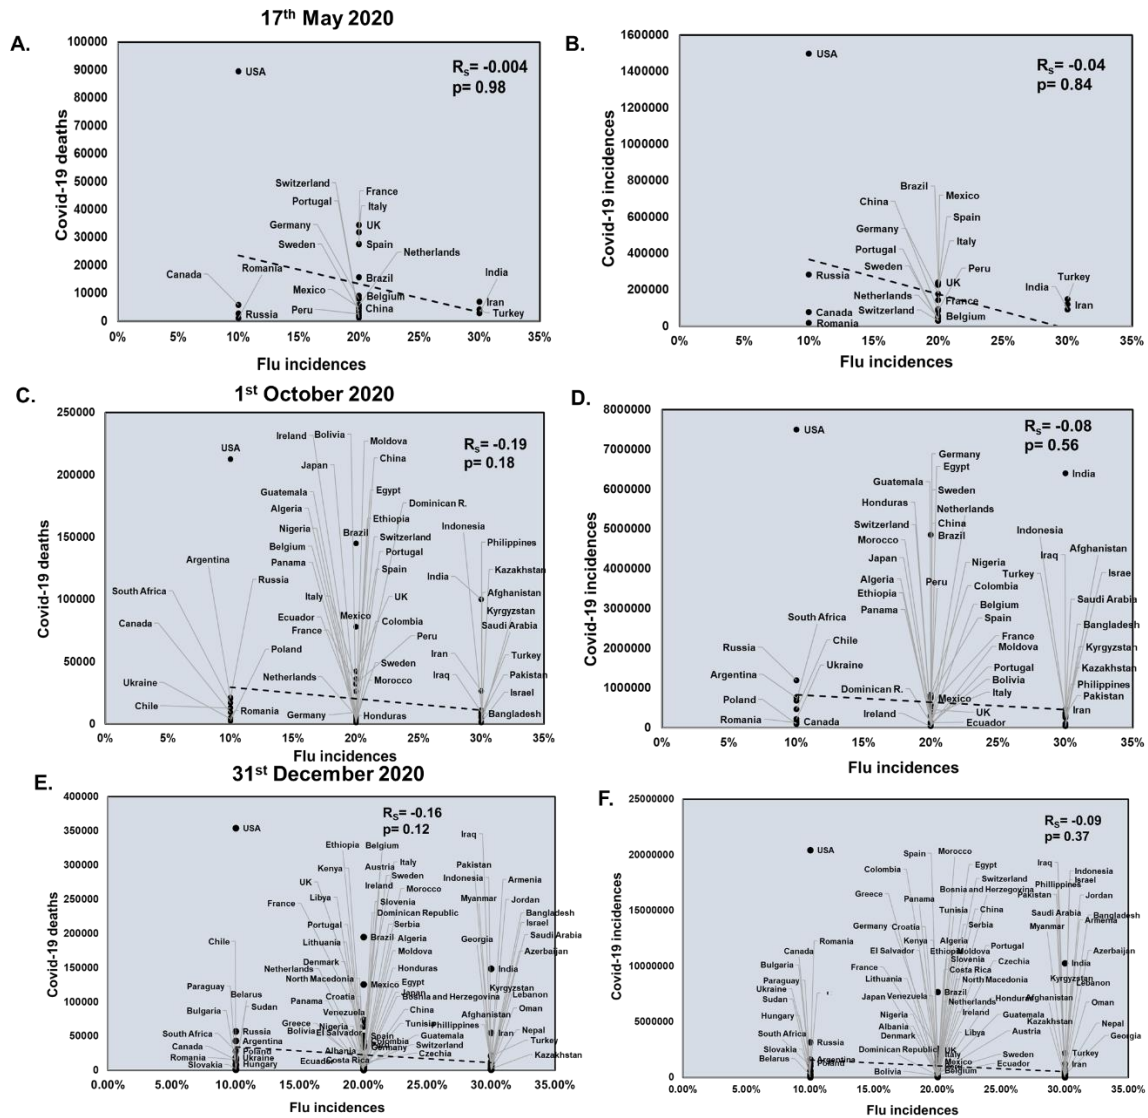

**Supplementary figure 1: Flu incidences do not correlate with total COVID-19 deaths and incidences:** Correlation of flu incidences was performed for countries at three different time points: 17<sup>th</sup> May 2020 (**A and B**), 1<sup>st</sup> October 2020 (**C and D**) and 31<sup>st</sup> December 2020 (**E and F**) with respect to COVID-19 deaths and incidences. Spearman's correlation coefficient value ( $R_s$ ) and the respective  $p$  values have been mentioned for each graph. Correlation has been considered statistically significant if  $p < 0.1$ .

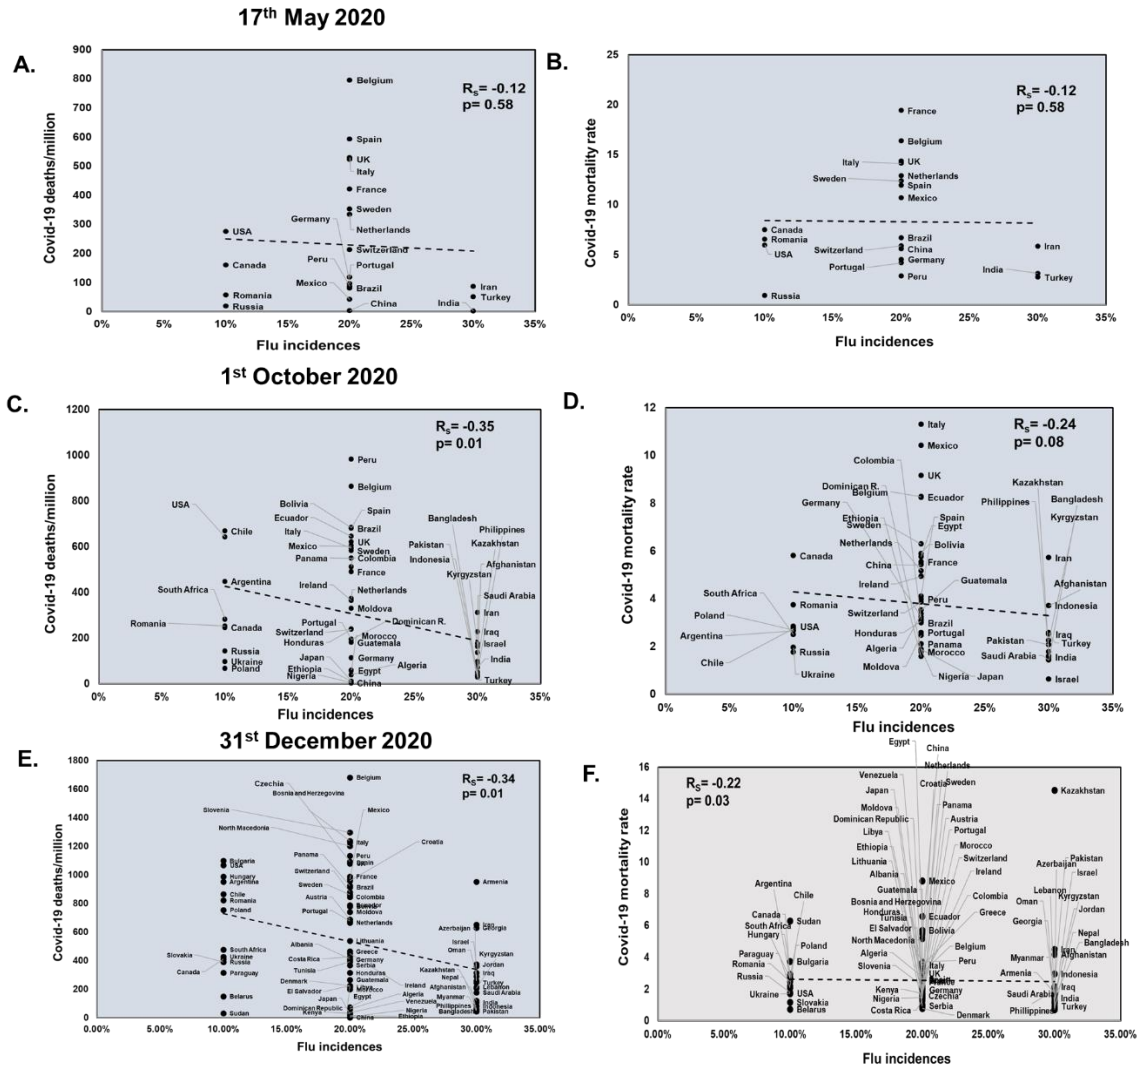

**Supplementary figure 2: COVID-19 deaths/million and mortality rate correlates with Flu incidences only in the 1<sup>st</sup> October and 31<sup>st</sup> December 2020 datasets:** Correlation of Flu incidences was performed of countries for three different time points: 17<sup>th</sup> May 2020 (**A and B**) and 1<sup>st</sup> October 2020 (**C and D**) and 31<sup>st</sup> December 2020 (**E and F**) with respect to COVID-19 deaths/million and mortality rate. Each graph has been correlated and the Spearman's correlation coefficient value ( $R_s$ ) has been calculated and the respective  $p$  values have also been estimated. Correlation has been considered statistically significant if  $p < 0.1$ .

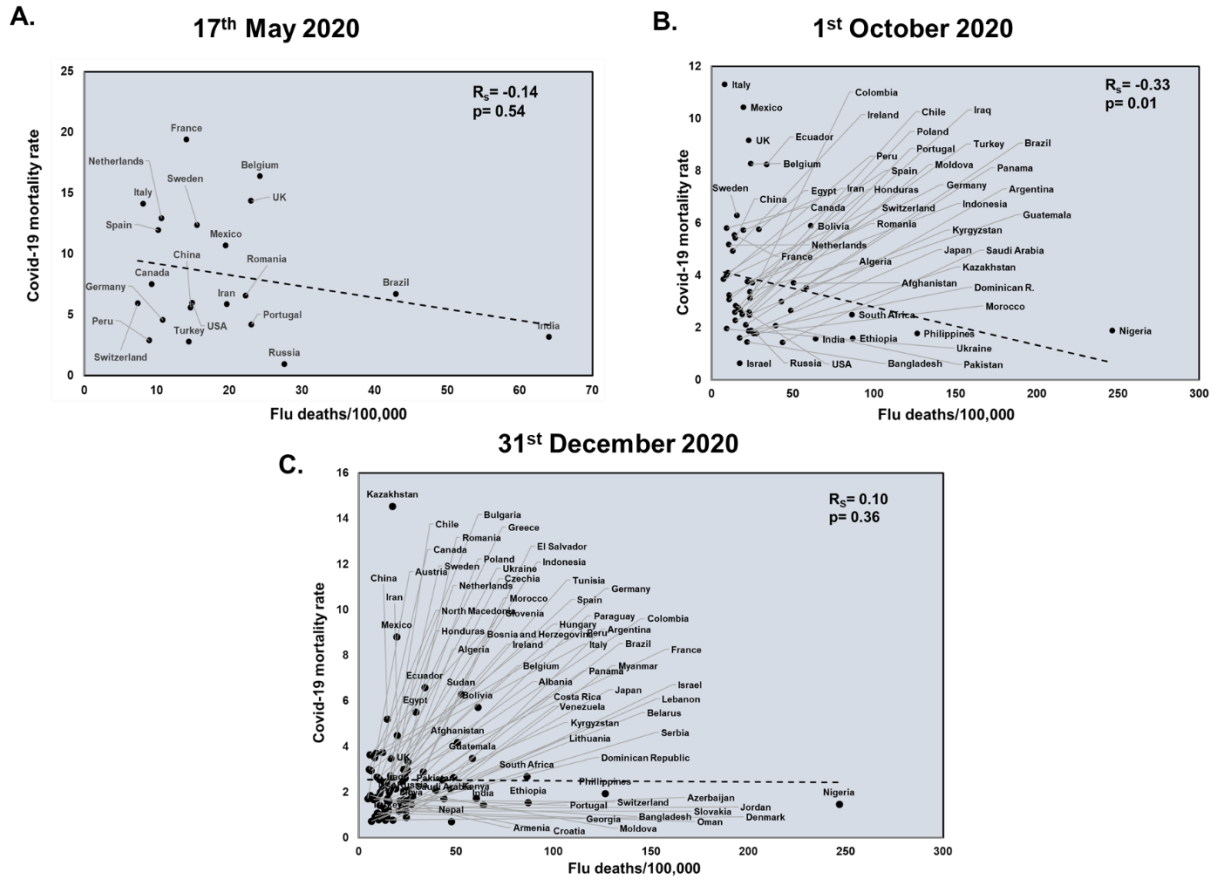

**Supplementary figure 3: Flu deaths correlates with COVID-19 mortality rate only in the 1<sup>st</sup> October 2020 dataset:** Correlation of flu deaths was performed for countries at three different time points: 17<sup>th</sup> May 2020 (A), 1<sup>st</sup> October 2020 (B) and 31<sup>st</sup> December 2020 (C) with respect to COVID-19 mortality rate. Spearman’s correlation coefficient value ( $R_s$ ) and the respective  $p$  values have been mentioned for each graph. Correlation has been considered statistically significant if  $p < 0.1$ .

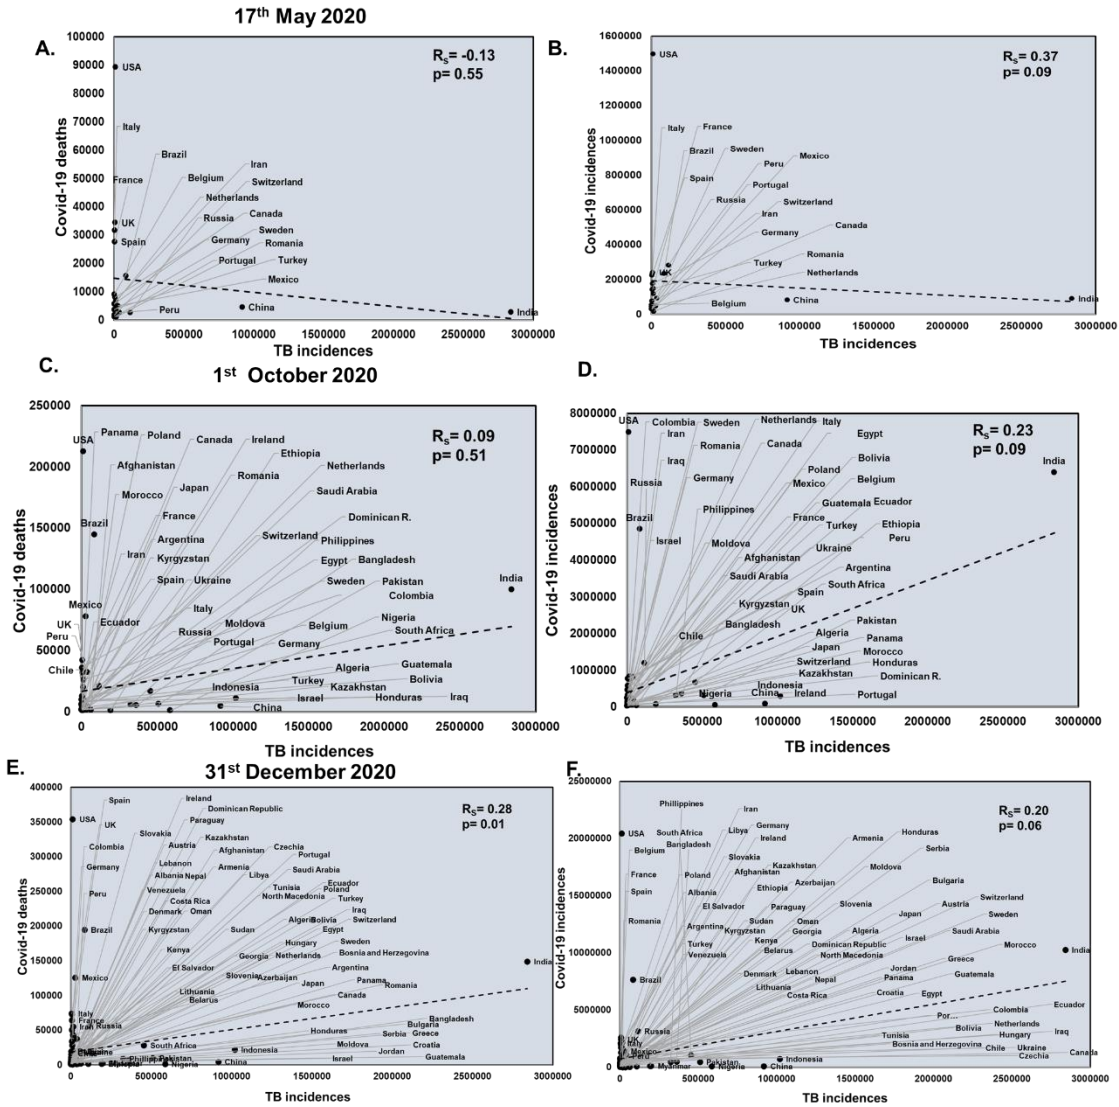

**Supplementary figure 4: TB incidences positively correlates with both total COVID-19 deaths and incidences only in the 31<sup>st</sup> December 2020 dataset:** TB incidences were correlated at three time points: 17<sup>th</sup> May 2020 (A and B), 1<sup>st</sup> October 2020 (C and D) and 31<sup>st</sup> December 2020 (E and F) with respect to COVID-19 deaths and incidences. Spearman's correlation coefficient value ( $R_s$ ) and the respective  $p$  values have been calculated for each graph. Correlation has been considered statistically significant if  $p < 0.1$ .

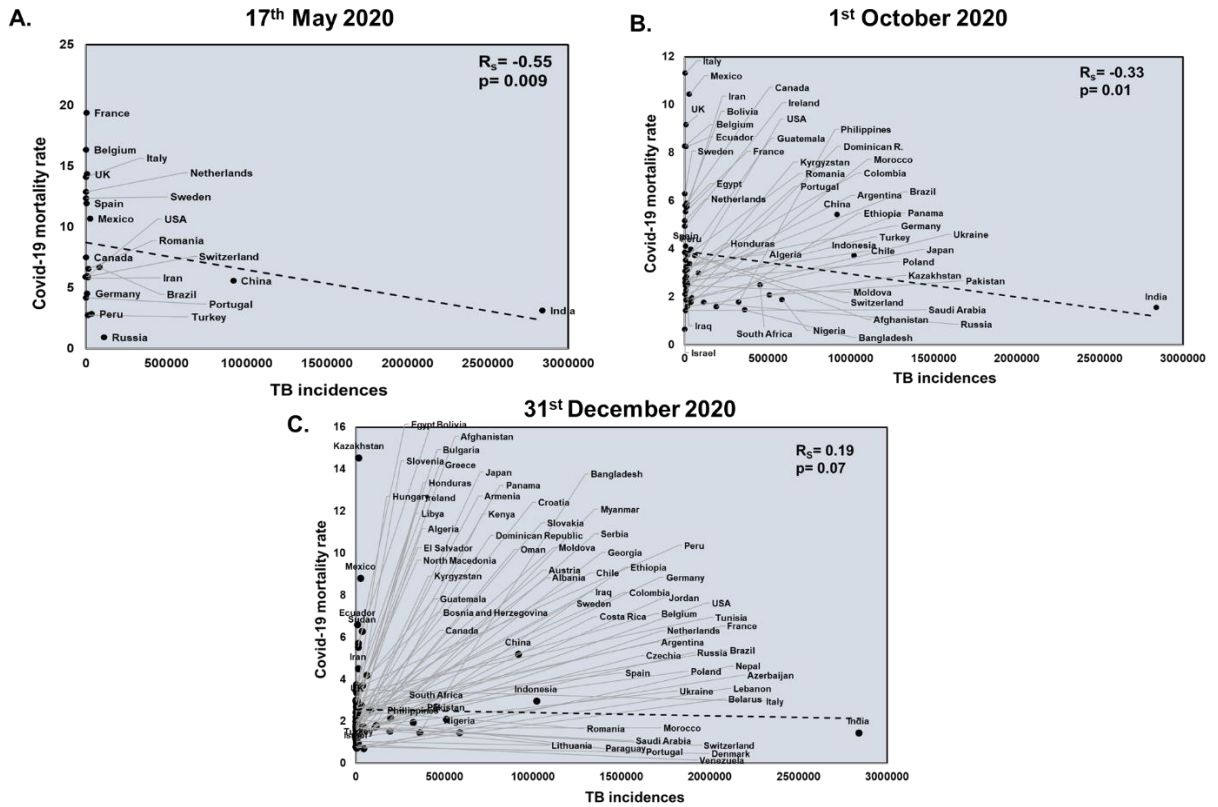

**Supplementary figure 5: TB incidences negatively correlates with COVID-19 mortality rate for the 17<sup>th</sup> May and 1<sup>st</sup> October 2020 datasets:** Correlation of TB incidences was performed for countries at three different time points: 17<sup>th</sup> May 2020 (A), 1<sup>st</sup> October 2020 (B) and 31<sup>st</sup> December 2020 (C) with respect to COVID-19 mortality rate. Spearman’s correlation coefficient value ( $R_s$ ) and the respective  $p$  values have been mentioned for each graph. Correlation has been considered statistically significant if  $p < 0.1$ .



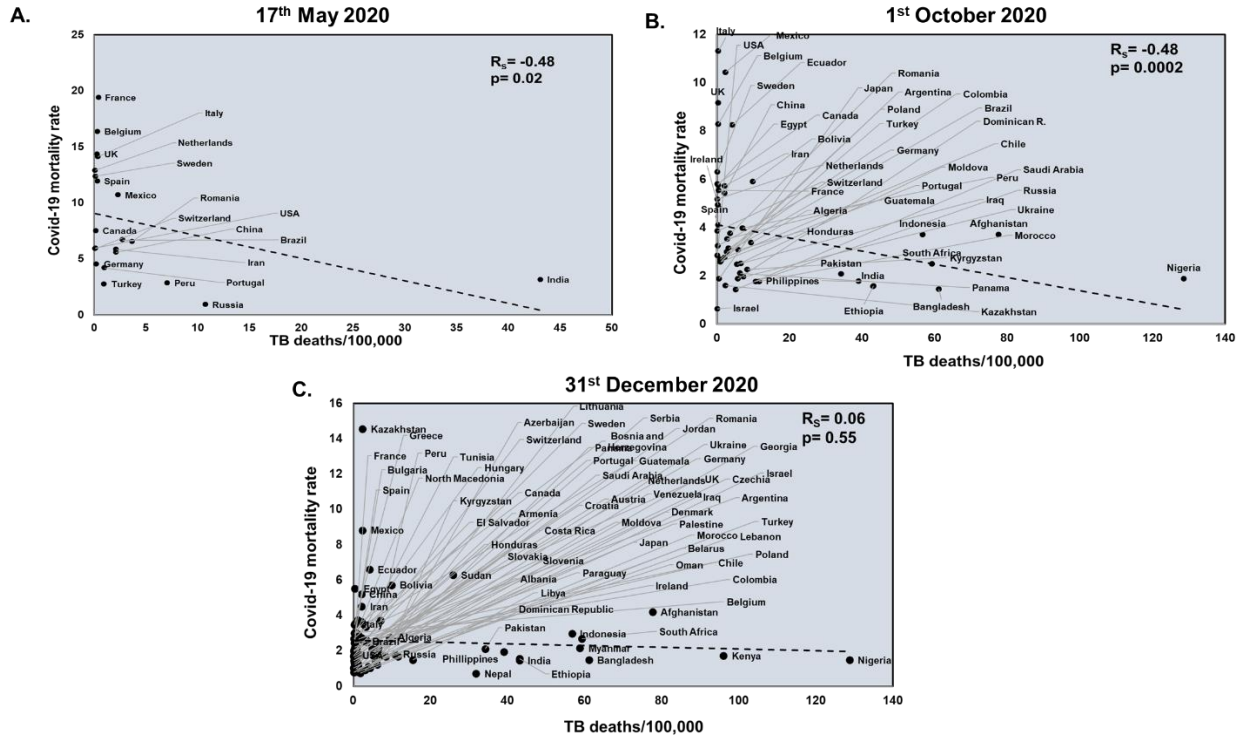

**Supplementary figure 6: TB deaths correlates with COVID-19 mortality rate for both the 17<sup>th</sup> May and 1<sup>st</sup> October 2020 data sets:** TB deaths correlation was performed for countries at two different time points: 17<sup>th</sup> May 2020 (A) and 1<sup>st</sup> October 2020 (B) and 31<sup>st</sup> December 2020 (C) with respect to COVID-19 mortality rate. Spearman’s correlation coefficient value ( $R_s$ ) and the respective  $p$  values have been mentioned for each graph. Correlation has been considered statistically significant if  $p < 0.1$ .

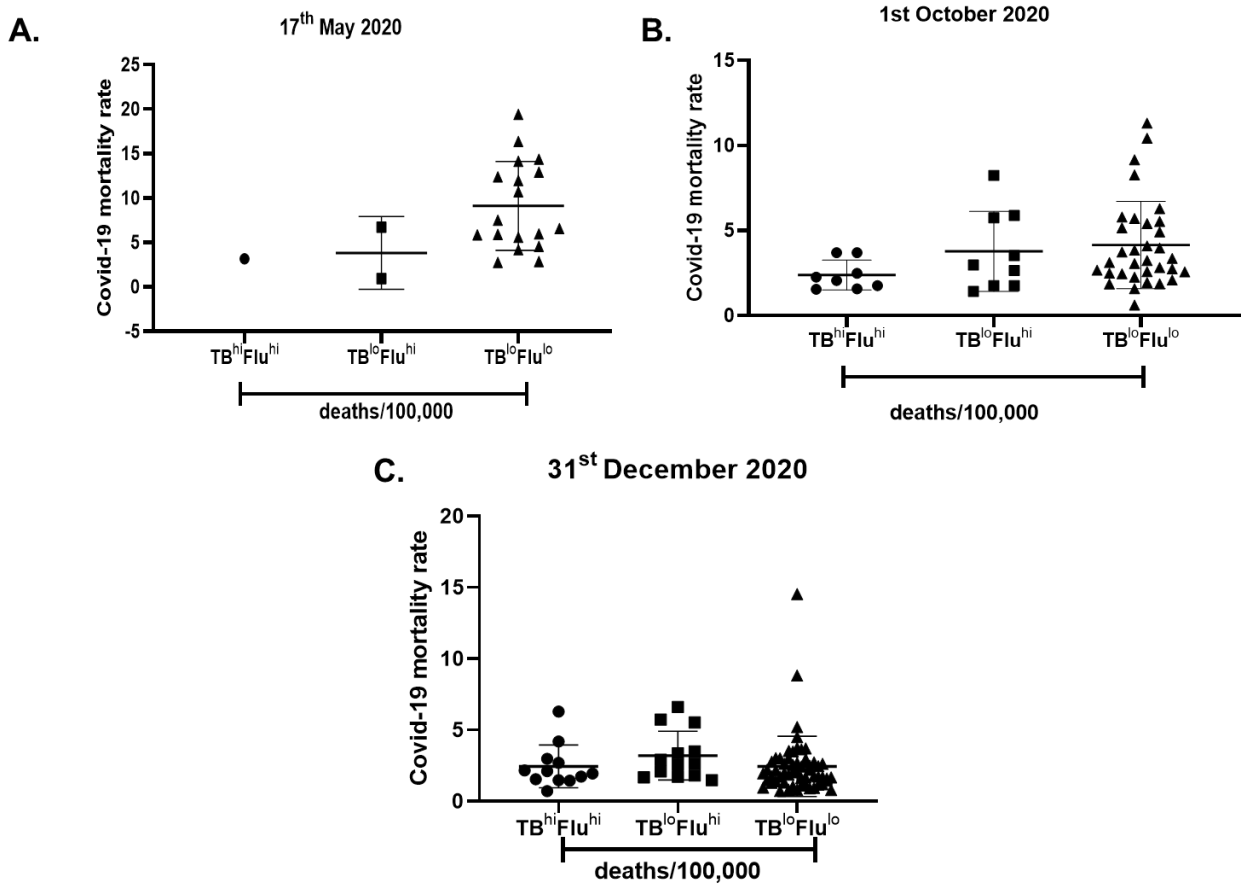

**Supplementary figure 7: COVID-19 mortality rate remains unaffected by the extent of TB and Flu deaths/100,000 in different countries:** Countries were grouped based on the extent of Flu and TB deaths/100,000 and analyzed for COVID-19 mortality rate. The countries were divided into three groups by keeping a cutoff in which countries having >25 deaths/100,000 were considered as high deaths and denoted as ‘hi’ whereas countries having <25 deaths/100,000 were denoted as ‘lo’. The three groups were analyzed for mean differences at three different time points: **A.** 17<sup>th</sup> May 2020, **B.** 1<sup>st</sup> October 2020 and **C.** 31<sup>st</sup> December 2020. One-way ANOVA was used to calculate the statistical significance.



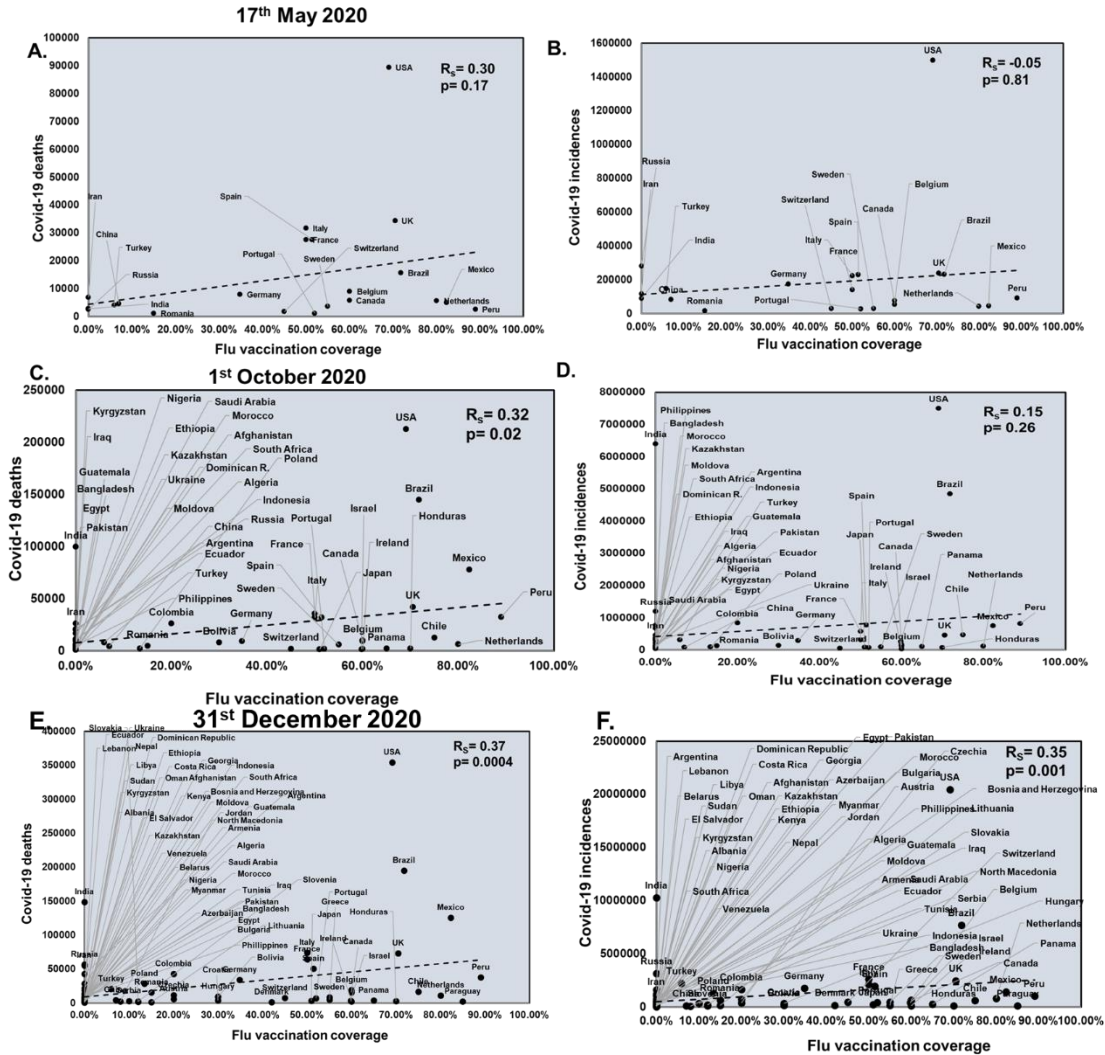

**Supplementary figure 9: Flu vaccination positively correlates with total COVID-19 deaths only in the 1<sup>st</sup> October and 31<sup>st</sup> December 2020 datasets:** Flu vaccination coverage correlation was performed for countries at three time points: 17<sup>th</sup> May 2020 (**A and B**), 1<sup>st</sup> October 2020 (**C and D**) and 31<sup>st</sup> December 2020 (**E and F**) with respect to COVID-19 deaths and incidences. Spearman’s correlation coefficient value ( $R_s$ ) and the respective  $p$  values have been mentioned for each graph. Correlation has been considered statistically significant if  $p < 0.1$ .

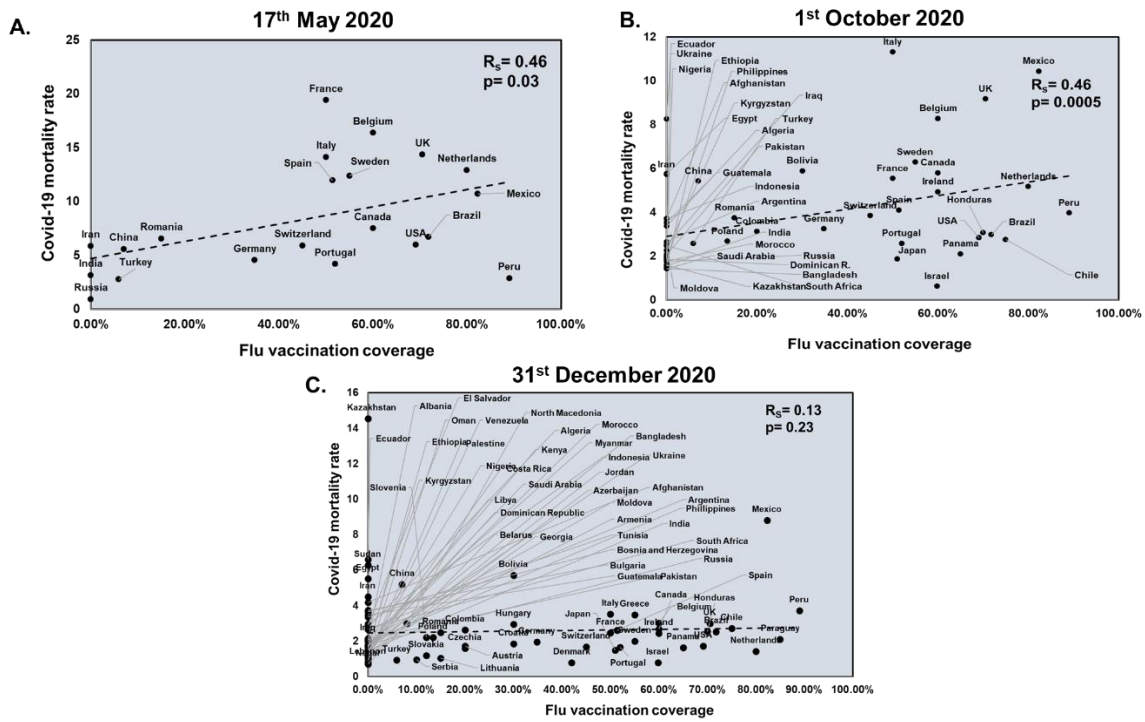

**Supplementary figure 10: Flu vaccination coverage positively correlates with COVID-19 mortality rate for both the 17<sup>th</sup> May and 1<sup>st</sup> October 2020 data sets:** Correlation of flu vaccination was performed for countries at three different time points: 17<sup>th</sup> May 2020 (A), 1<sup>st</sup> October 2020 (B) and 31<sup>st</sup> December 2020 (C) with respect to COVID-19 mortality rate. Spearman’s correlation coefficient value ( $R_s$ ) and the respective  $p$  values have been mentioned for each graph. Correlation has been considered statistically significant if  $p < 0.1$ .

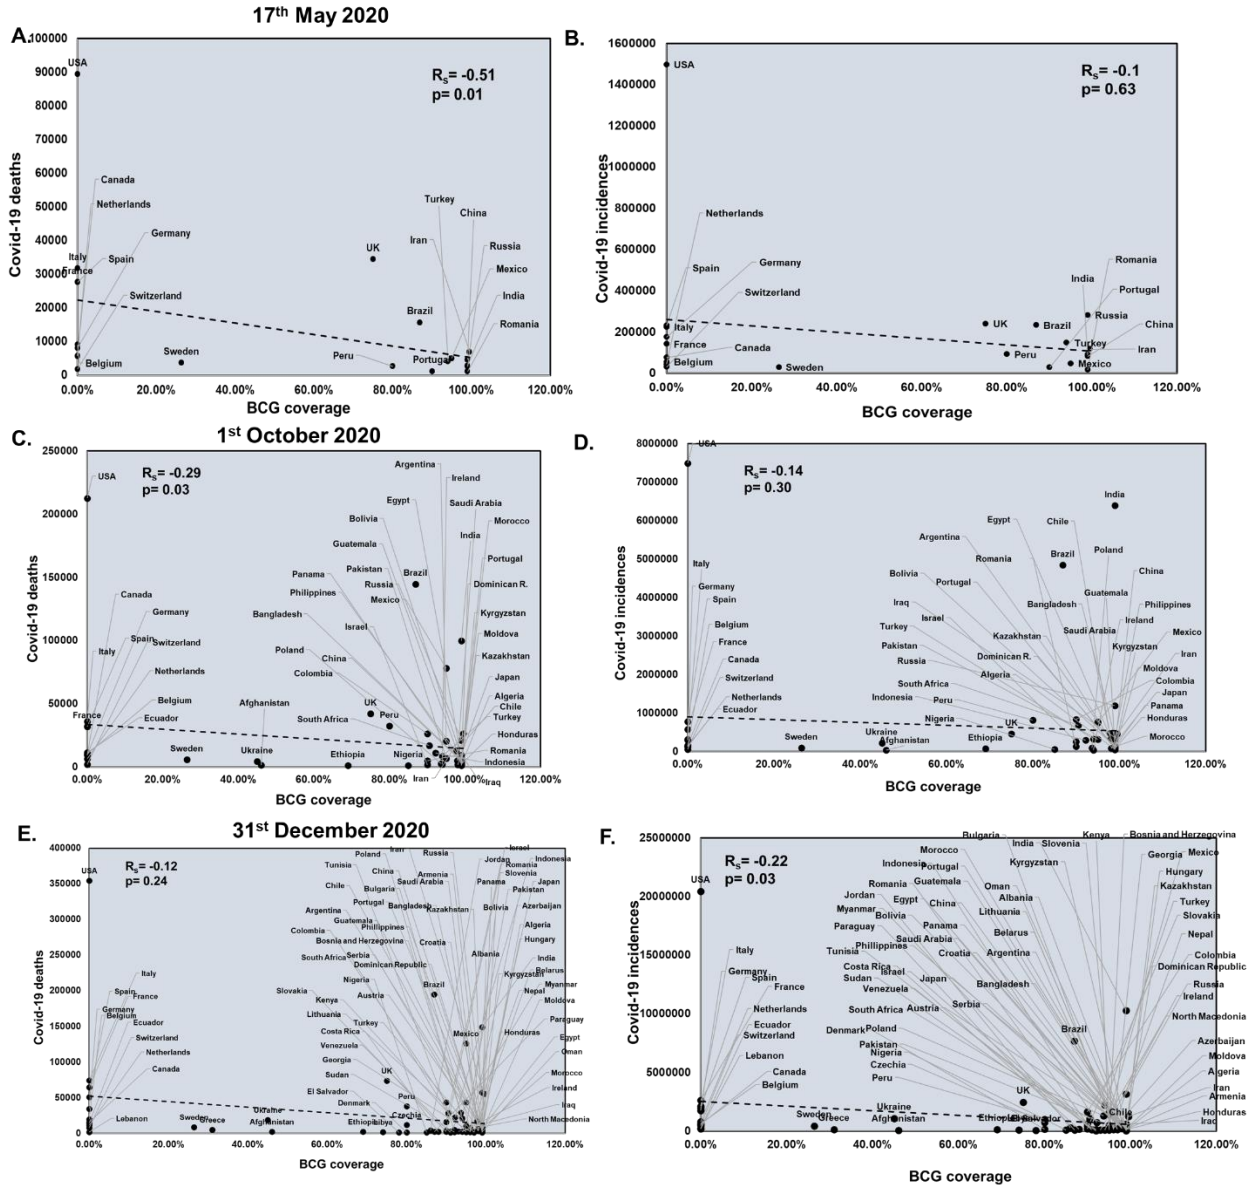

**Supplementary figure 11: BCG coverage negatively correlates with total COVID-19 deaths specifically in the 17<sup>th</sup> May and 1<sup>st</sup> October 2020 datasets:** Correlation of BCG coverage of different countries was performed at three time points: 17<sup>th</sup> May 2020 (**A and B**), 1<sup>st</sup> October 2020 (**C and D**) and 31<sup>st</sup> December 2020 (**E and F**) with respect to COVID-19 deaths and incidences. Spearman’s correlation coefficient value ( $R_s$ ) and the respective  $p$  values have been calculated for each graph. Correlation has been considered statistically significant if  $p < 0.1$ .

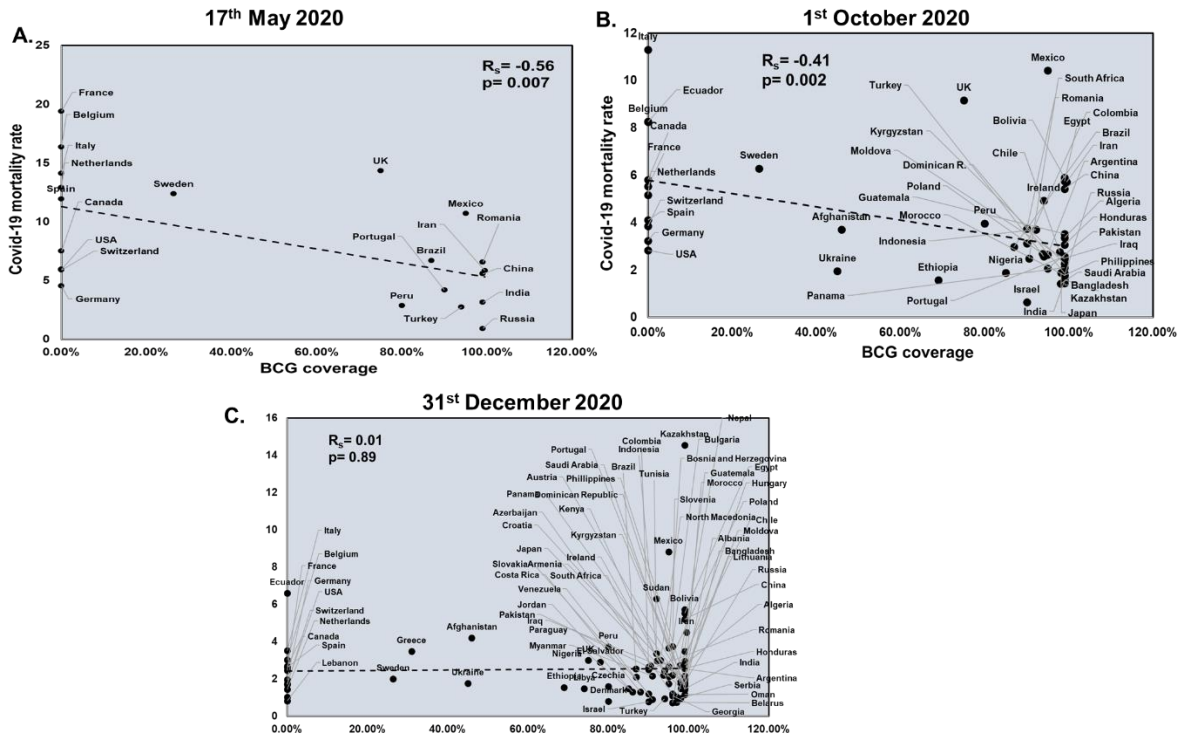

**Supplementary figure 12: BCG coverage negatively correlates with COVID-19 mortality rate for only the 17<sup>th</sup> May and 1<sup>st</sup> October 2020 datasets:** Correlation of BCG was performed for countries at three different time points: 17<sup>th</sup> May 2020 (A), 1<sup>st</sup> October 2020 (B) and 31<sup>st</sup> December 2020(C) with respect to COVID-19 mortality rate. Spearman’s correlation coefficient value ( $R_s$ ) and the respective  $p$  values have been mentioned for each graph. Correlation has been considered statistically significant if  $p < 0.1$ .

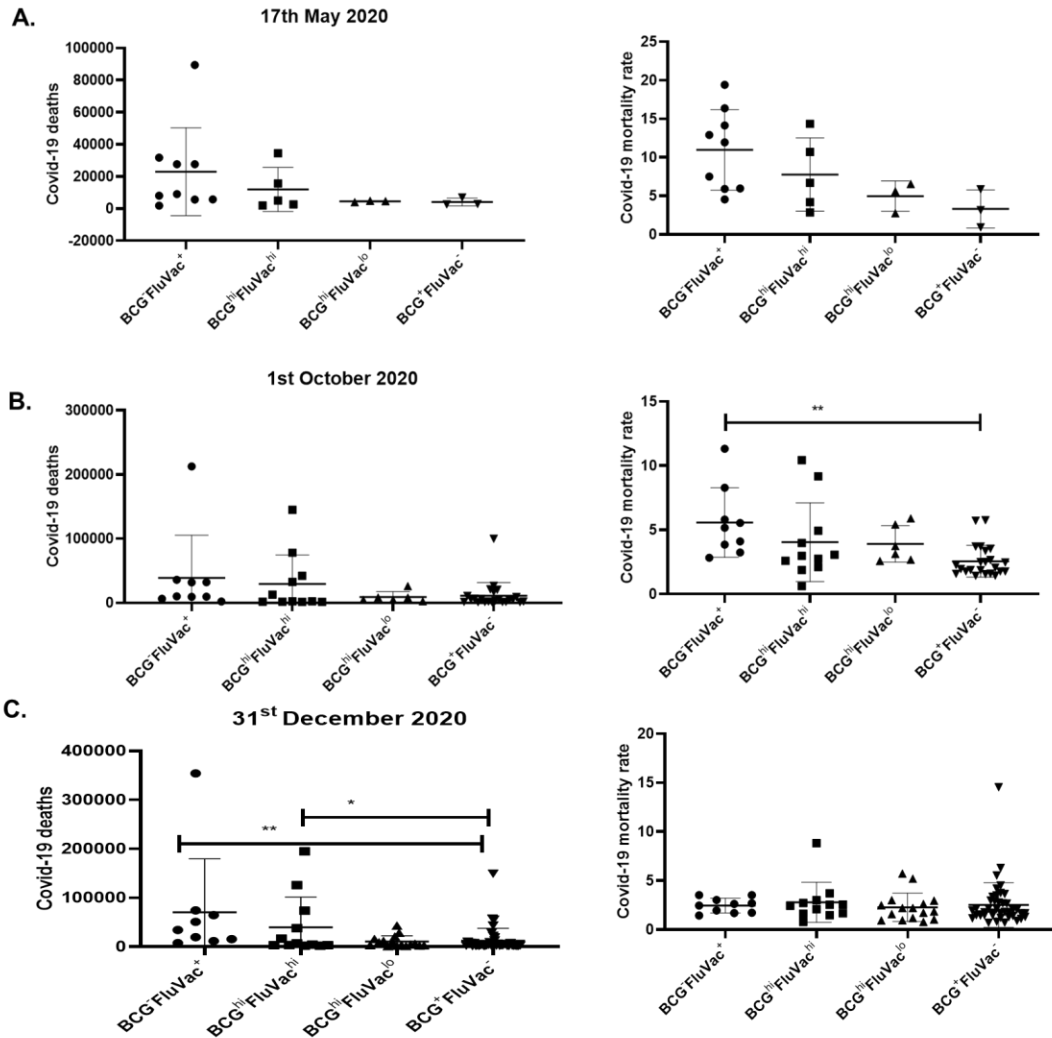

**Supplementary figure 13: COVID-19 deaths and mortality rate is the lowest in BCG<sup>+</sup>FluVacc<sup>-</sup> countries at some time points:** Countries were grouped based on the coverage of BCG and flu vaccination and analyzed for COVID-19 deaths and COVID-19 mortality rate. These vast majority of countries were divided into four groups firstly based on the availability or non-availability of BCG or flu vaccination, designated with ‘+’ and ‘-’ respectively. Next, the groups were further classified based on the extent of coverage of a particular vaccination. Countries with >50% coverage of a particular vaccination were considered having high vaccination and denoted with ‘hi’ whereas countries with <50% coverage were considered having low vaccination coverage and thus denoted ‘lo’. The four groups were analyzed for mean differences at three different time points: **A.** 17<sup>th</sup> May 2020, **B.** 1<sup>st</sup> October 2020 and **C.** 31<sup>st</sup> December 2020. One-way ANOVA was used to calculate the statistical significance, \*\*p<0.01



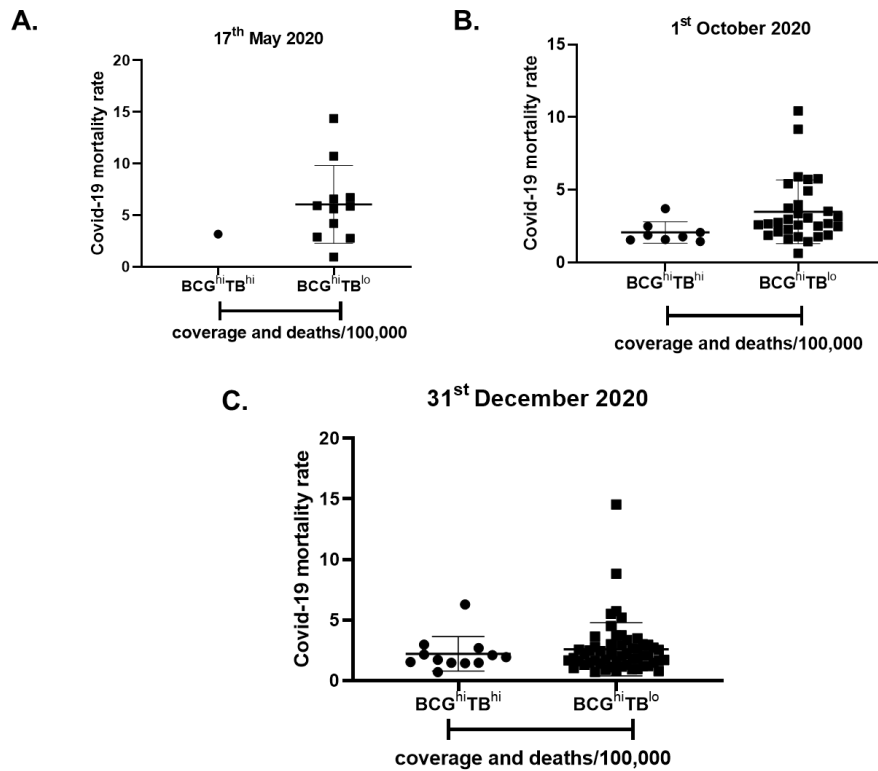

**Supplementary figure 14: COVID-19 mortality rate is not affected by BCG coverage and TB deaths:** Countries with BCG coverage and TB deaths were further classified based on the extent of vaccine coverage and deaths/100,000. The two major groups were: BCG<sup>hi</sup>TB<sup>hi</sup> and BCG<sup>hi</sup>TB<sup>lo</sup>. The data was plotted based on COVID-19 mortality rate for **A.** 17<sup>th</sup> May 2020, **B.** 1<sup>st</sup> October 2020 and **C.** 31<sup>st</sup> December 2020. Unpaired t test was used to calculate statistical significance.

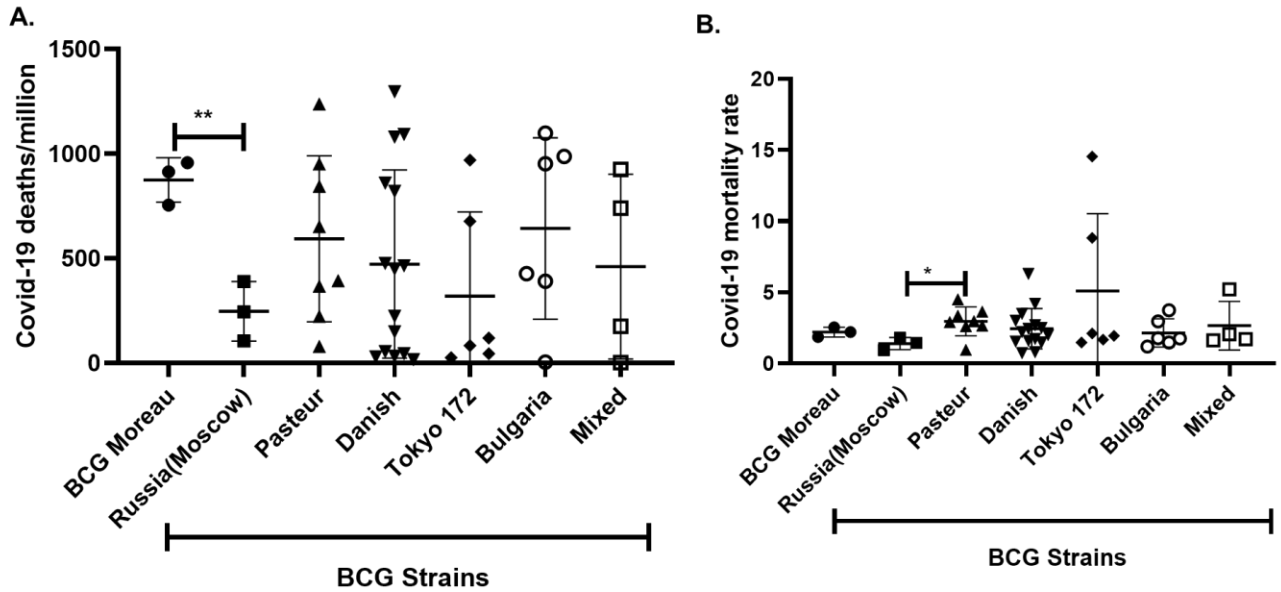

**Supplementary figure 15: Countries which use the BCG Russian (Moscow) strain have one of the lowest Covid-19 deaths:** Countries were segregated based on the different types of BCG strains used and compared with respect to **A.** Covid-19 deaths/million and **B.** Covid-19 mortality rate. One-way Anova was used to calculate statistical significance
